# Supplementary material
Source: Royal Society of Chemistry journal article supplement (doi:10.1039/d5an01279a)
Supplement: d5an01279a1.pdf [file d5an01279a1.pdf]

*Supporting Information*

**Interpretable Machine Learning Model-Driven Electrochemical Impedance Spectroscopic Analysis for Determination of Nitrate, Nitrite Ammonium Ions in Water**

**Reji K.<sup>a</sup>, Ramakrishnan Vishnuraj<sup>b,c</sup>, Adithyakrishna Narayanaswamy<sup>d</sup>, Vishnuvarthan Rajagopal<sup>e</sup>, Vishnu S.<sup>e\*</sup> Murali Rangarajan<sup>b,c,f\*</sup>**

<sup>a</sup>Department of Electrical and Electronics Engineering, Amrita School of Engineering Coimbatore, Amrita Vishwa Vidyapeetham, India.

<sup>b</sup>Center of Excellence in Advanced Materials and Green Technologies, Amrita School of Engineering Coimbatore, Amrita Vishwa Vidyapeetham, India.

<sup>c</sup>Department of Chemical Engineering and Materials Science, Amrita School of Engineering Coimbatore, Amrita Vishwa Vidyapeetham, India.

<sup>d</sup>Department of Chemical Engineering, University of Florida, Gainesville, Florida.

<sup>e</sup>Department of Computer Science and Engineering, Amrita School of Computing Coimbatore, Amrita Vishwa Vidyapeetham, India.

<sup>f</sup>Gurukripa Electrolyzers Private Limited, Coimbatore, India.

\*Corresponding Author, Email: [r\\_murali@cb.amrita.edu](mailto:r_murali@cb.amrita.edu); [s\\_vishnu1@cb.amrita.edu](mailto:s_vishnu1@cb.amrita.edu).

**Measurements Techniques used:**

Conductivity and pH were analysed for the simulated water samples using LABMAN Multiparameter LMMP-30 instrument. Electrochemical impedance spectra (EIS) were obtained using CH Instruments, Inc., (CHI604E. USA) electrochemical workstation. The electrochemical cell constitutes of working & counter electrodes of stainless steel and Ag/AgCl reference electrode were immersed in the simulated water solution. A 10mV AC signal superimposed on the open circuit potential (OCP) of the system and the frequency response of the impedance was measured in the range from 1Hz - 1MHz. Frequency response of the measured impedance was depicted either as a Bode plot or as a Nyquist plot. Appropriate equivalent electrical circuit models were developed to capture the behaviour of the stainless steel-solution interface. The magnitudes of the components of the equivalent circuit were obtained by non-linear regression (Aftermath®). Fits with rms errors less than 5% were accepted. Further, to develop the electrochemical impedance-based sensor for the analytes NO<sub>3</sub><sup>-</sup>, NO<sub>2</sub><sup>-</sup> and NH<sub>4</sub><sup>+</sup>, known quantities of the three constituents

were added to the base solution thus prepared. The amounts of the three analytes added are presented in **Table S1**.

**Table S1.** Amounts of  $\text{NO}_3^-$ ,  $\text{NO}_2^-$  and  $\text{NH}_4^+$  added to the Base Solution to Prepare Simulated Solutions:

| <b>Set - I Nitrate<br/>Concentration (ppm)</b>                                       | <b>Set - II Nitrite<br/>Concentration (ppm)</b>                                     | <b>Set - III Ammonium<br/>Concentration (ppm)</b>                                   |
|--------------------------------------------------------------------------------------|-------------------------------------------------------------------------------------|-------------------------------------------------------------------------------------|
| 7                                                                                    | 0.5                                                                                 | 0.5                                                                                 |
| 14                                                                                   | 1.5                                                                                 | 1.5                                                                                 |
| 21                                                                                   | 3.0                                                                                 | 3.0                                                                                 |
| 28                                                                                   | 4.5                                                                                 | 4.5                                                                                 |
| 35                                                                                   | 6.0                                                                                 | 6.0                                                                                 |
| 42                                                                                   | 8.5                                                                                 | 8.5                                                                                 |
| 50                                                                                   | 10.0                                                                                | 10.0                                                                                |
| <b><math>\text{NO}_2^-</math> : 4.5 ppm<br/><math>\text{NH}_4^+</math> : 4.5 ppm</b> | <b><math>\text{NO}_3^-</math> : 28 ppm<br/><math>\text{NH}_4^+</math> : 4.5 ppm</b> | <b><math>\text{NO}_3^-</math> : 28 ppm<br/><math>\text{NO}_2^-</math> : 4.5 ppm</b> |

**Table S2.** Measured pH value for  $\text{NO}_3^-$ ,  $\text{NO}_2^-$  and  $\text{NH}_4^+$  added simulated solution:

| DI water pH: <b>0.055</b> $\mu\text{S/cm}$ |                                                         |                                |                                                         |                                |                                                         |
|--------------------------------------------|---------------------------------------------------------|--------------------------------|---------------------------------------------------------|--------------------------------|---------------------------------------------------------|
| <b>Concentration<br/>(ppm)</b>             | <b>pH of varied<br/><math>\text{NO}_3^-</math> ions</b> | <b>Concentration<br/>(ppm)</b> | <b>pH of varied<br/><math>\text{NO}_2^-</math> ions</b> | <b>Concentration<br/>(ppm)</b> | <b>pH of varied<br/><math>\text{NH}_4^+</math> ions</b> |
| 7                                          | 7.305                                                   | 0.5                            | 7.347                                                   | 0.5                            | 7.589                                                   |
| 14                                         | 6.879                                                   | 1.5                            | 7.111                                                   | 1.5                            | 7.158                                                   |
| 21                                         | 6.586                                                   | 3.0                            | 6.810                                                   | 3.0                            | 6.811                                                   |
| 28                                         | 6.214                                                   | 4.5                            | 6.637                                                   | 4.5                            | 6.605                                                   |
| 35                                         | 6.155                                                   | 6.0                            | 6.508                                                   | 6.0                            | 6.375                                                   |
| 42                                         | 6.078                                                   | 8.5                            | 6.395                                                   | 8.5                            | 6.202                                                   |
| 50                                         | 5.992                                                   | 10                             | 6.319                                                   | 10                             | 6.143                                                   |

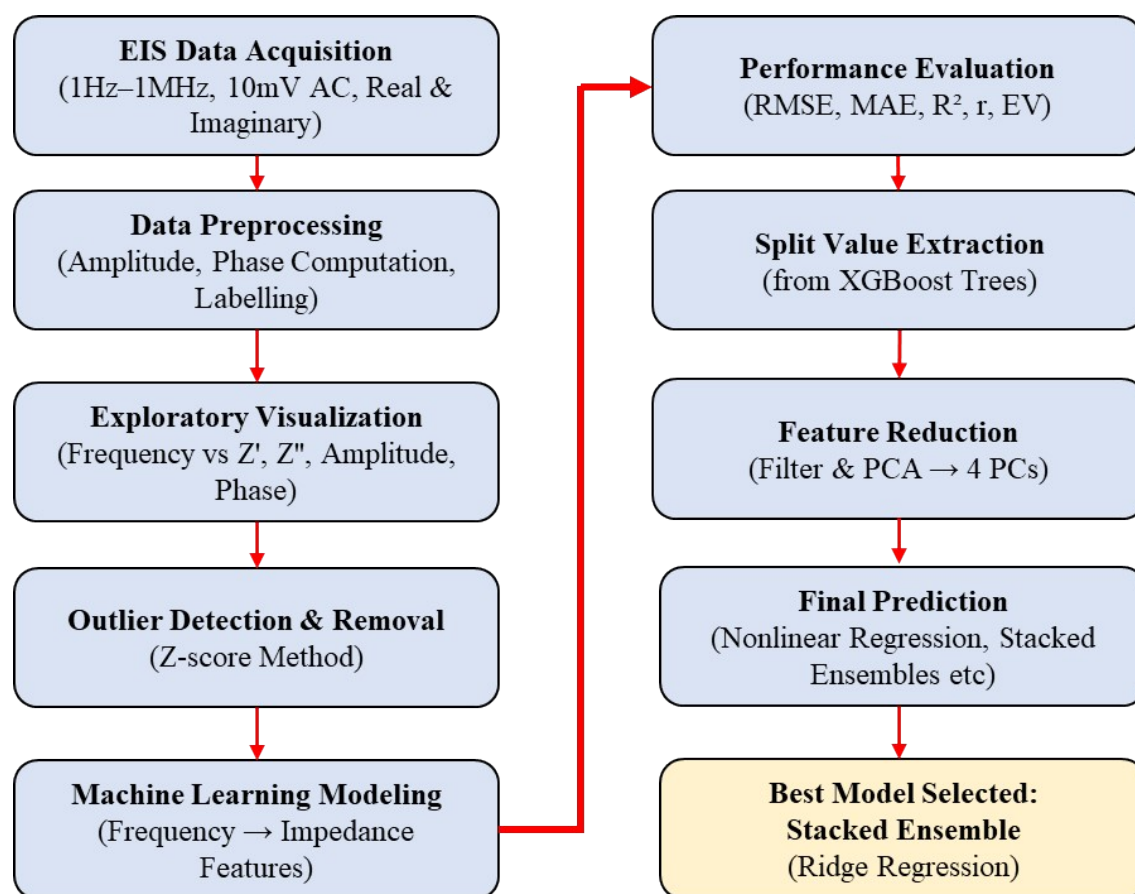

**Figure S1** Flowchart of the methodology for  $\text{NO}_3^-$ ,  $\text{NO}_2^-$ , and  $\text{NH}_4^+$  concentration prediction using EIS and machine learning.

**Table S3.** Evaluation metrics for all ML models of  $\text{NO}_3^-$ ,  $\text{NO}_2^-$  and  $\text{NH}_4^+$ .

| Parameter  | Analyte             | ML Model       | MSE          | RMSE         | MAE          | R <sup>2</sup> | EV            |
|------------|---------------------|----------------|--------------|--------------|--------------|----------------|---------------|
| Real value | Nitrate<br>(28ppm)  | RF             | 632.826      | 25.156       | 11.011       | 0.9976         | 0.9977        |
|            |                     | KNN            | 8297.438     | 91.090       | 43.059       | 0.9680         | 0.9698        |
|            |                     | SVR            | 227207.906   | 476.663      | 203.481      | 0.1230         | 0.2675        |
|            |                     | ANN            | 4642256.946  | 2154.590     | 1298.716     | -16.9190       | -16.8563      |
|            |                     | <b>XGBoost</b> | <b>0.004</b> | <b>0.064</b> | <b>0.038</b> | <b>0.9999</b>  | <b>0.9999</b> |
|            | Nitrite<br>(4.5ppm) | RF             | 1144.491     | 33.830       | 15.460       | 0.9978         | 0.9980        |
|            |                     | KNN            | 14882.268    | 121.993      | 60.305       | 0.9717         | 0.9737        |
|            |                     | SVR            | 415173.416   | 644.340      | 287.483      | 0.2110         | 0.3326        |
|            |                     | ANN            | 5411004.249  | 2326.157     | 1627.279     | -9.2830        | -9.1773       |
|            |                     | <b>XGBoost</b> | <b>0.010</b> | <b>0.099</b> | <b>0.055</b> | <b>0.9999</b>  | <b>0.9999</b> |

|                    |                      |                |              |              |              |               |               |
|--------------------|----------------------|----------------|--------------|--------------|--------------|---------------|---------------|
|                    |                      | RF             | 1185.583     | 34.432       | 15.044       | 0.9979        | 0.9980        |
|                    | Ammonium<br>(4.5ppm) | KNN            | 16234.416    | 127.414      | 61.077       | 0.9709        | 0.9727        |
|                    |                      | SVR            | 478630.987   | 691.832      | 308.065      | 0.1412        | 0.2725        |
|                    |                      | ANN            | 5262061.103  | 2293.918     | 1558.762     | -8.4416       | -8.3891       |
|                    |                      | <b>XGBoost</b> | <b>0.015</b> | <b>0.124</b> | <b>0.074</b> | <b>0.9999</b> | <b>0.9999</b> |
|                    |                      | RF             | 5943.444     | 77.094       | 30.157       | 0.9962        | 0.9964        |
|                    | Nitrate<br>(28ppm)   | KNN            | 74177.237    | 272.355      | 113.039      | 0.9532        | 0.9543        |
|                    |                      | SVR            | 1825222.971  | 1351.008     | 576.276      | -0.1524       | 0.0038        |
|                    |                      | ANN            | 4296007.676  | 2072.681     | 1149.936     | -1.7125       | -1.7099       |
|                    |                      | <b>XGBoost</b> | <b>0.024</b> | <b>0.154</b> | <b>0.097</b> | <b>0.9999</b> | <b>0.9999</b> |
|                    |                      | RF             | 9172.728     | 95.774       | 38.521       | 0.9962        | 0.9963        |
| Imaginary<br>value | Nitrite<br>(4.5ppm)  | KNN            | 113609.447   | 337.060      | 143.475      | 0.9534        | 0.9546        |
|                    |                      | SVR            | 2780516.113  | 1667.488     | 722.362      | -0.1417       | 0.0058        |
|                    |                      | ANN            | 7146115.128  | 2673.222     | 1475.143     | -1.9342       | -1.9326       |
|                    |                      | <b>XGBoost</b> | <b>0.058</b> | <b>0.241</b> | <b>0.148</b> | <b>0.9999</b> | <b>0.9999</b> |
|                    |                      | RF             | 10502.596    | 102.482      | 39.675       | 0.9966        | 0.9967        |
|                    | Ammonium<br>(4.5ppm) | KNN            | 145174.910   | 381.018      | 158.156      | 0.9534        | 0.9546        |
|                    |                      | SVR            | 3560285.303  | 1886.872     | 802.665      | -0.1424       | 0.0081        |
|                    |                      | ANN            | 6095350.062  | 2468.876     | 1367.717     | -0.9558       | -0.9163       |
|                    |                      | <b>XGBoost</b> | <b>0.101</b> | <b>0.318</b> | <b>0.203</b> | <b>0.9999</b> | <b>0.9999</b> |
|                    |                      | RF             | 6434.928     | 80.218       | 29.981       | 0.9962        | 0.9963        |
|                    | Nitrate<br>(28ppm)   | KNN            | 80602.759    | 283.906      | 115.869      | 0.9522        | 0.9536        |
|                    |                      | SVR            | 1850489.748  | 1360.327     | 539.792      | -0.0971       | 0.0699        |
|                    |                      | ANN            | 6655575.773  | 2579.840     | 1631.500     | -2.9458       | -2.9164       |
|                    |                      | <b>XGBoost</b> | <b>0.018</b> | <b>0.136</b> | <b>0.091</b> | <b>0.9999</b> | <b>0.9999</b> |
|                    |                      | RF             | 9979.890     | 99.899       | 38.086       | 0.9962        | 0.9964        |
| Amplitude          | Nitrite<br>(4.5ppm)  | KNN            | 123961.832   | 352.082      | 146.686      | 0.9534        | 0.9549        |
|                    |                      | SVR            | 2819016.422  | 1678.993     | 670.207      | -0.0608       | 0.0987        |
|                    |                      | ANN            | 8550436.946  | 2924.113     | 2014.805     | -2.2176       | -2.0581       |
|                    |                      | <b>XGBoost</b> | <b>0.093</b> | <b>0.304</b> | <b>0.192</b> | <b>0.9999</b> | <b>0.9999</b> |
|                    |                      | RF             | 11399.578    | 106.769      | 39.269       | 0.9966        | 0.9967        |
|                    | Ammonium<br>(4.5ppm) | KNN            | 157179.674   | 396.459      | 162.091      | 0.9534        | 0.9548        |
|                    |                      | SVR            | 3663939.463  | 1914.142     | 763.285      | -0.0870       | 0.0756        |
|                    |                      | ANN            | 9212142.981  | 3035.151     | 2018.662     | -1.7329       | -1.6051       |
|                    |                      | <b>XGBoost</b> | <b>0.036</b> | <b>0.190</b> | <b>0.129</b> | <b>0.9999</b> | <b>0.9999</b> |
|                    |                      | RF             | 0.321        | 0.567        | 0.483        | 0.9993        | 0.9993        |
| Phase              | Nitrate<br>(28ppm)   | KNN            | 4.239        | 2.059        | 1.699        | 0.9901        | 0.9903        |
|                    |                      | SVR            | 449.329      | 21.197       | 14.061       | -0.0468       | 0.0800        |
|                    |                      | ANN            | 2384012.562  | 1544.025     | 606.093      | -5552.9872    | 4786.0572     |
|                    |                      | <b>XGBoost</b> | <b>0.000</b> | <b>0.004</b> | <b>0.002</b> | <b>0.9999</b> | <b>0.9999</b> |
|                    | Nitrite              | RF             | 0.313        | 0.559        | 0.486        | 0.9992        | 0.9992        |

|                      |                |              |              |              |               |               |
|----------------------|----------------|--------------|--------------|--------------|---------------|---------------|
| (4.5ppm)             | KNN            | 4.107        | 2.027        | 1.687        | 0.9900        | 0.9901        |
|                      | SVR            | 388.657      | 19.714       | 12.817       | 0.0562        | 0.1655        |
|                      | ANN            | 4211991.147  | 2052.314     | 800.073      | 10227.4467    | 8783.0821     |
|                      | <b>XGBoost</b> | <b>0.000</b> | <b>0.002</b> | <b>0.001</b> | <b>0.9999</b> | <b>0.9999</b> |
|                      | RF             | 0.305        | 0.552        | 0.481        | 0.9993        | 0.9993        |
|                      | KNN            | 3.989        | 1.997        | 1.667        | 0.9904        | 0.9906        |
|                      | SVR            | 411.250      | 20.279       | 13.722       | 0.0105        | 0.1043        |
| Ammonium<br>(4.5ppm) | ANN            | 2294549.145  | 1514.777     | 589.279      | -5519.6885    | 4771.0737     |
|                      | <b>XGBoost</b> | <b>0.000</b> | <b>0.004</b> | <b>0.003</b> | <b>0.9999</b> | <b>0.9999</b> |

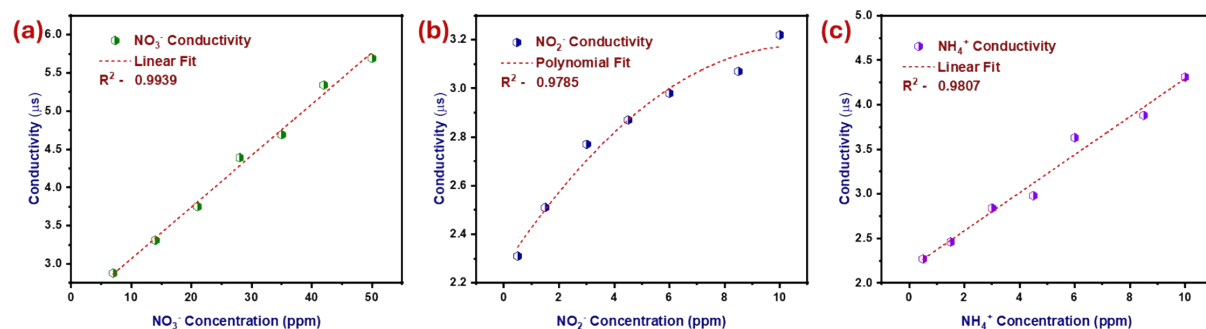

**Figure S2.** Conductivity Plot for (a) Nitrate (b) Nitrite and (c) Ammonium ions in simulated solution.

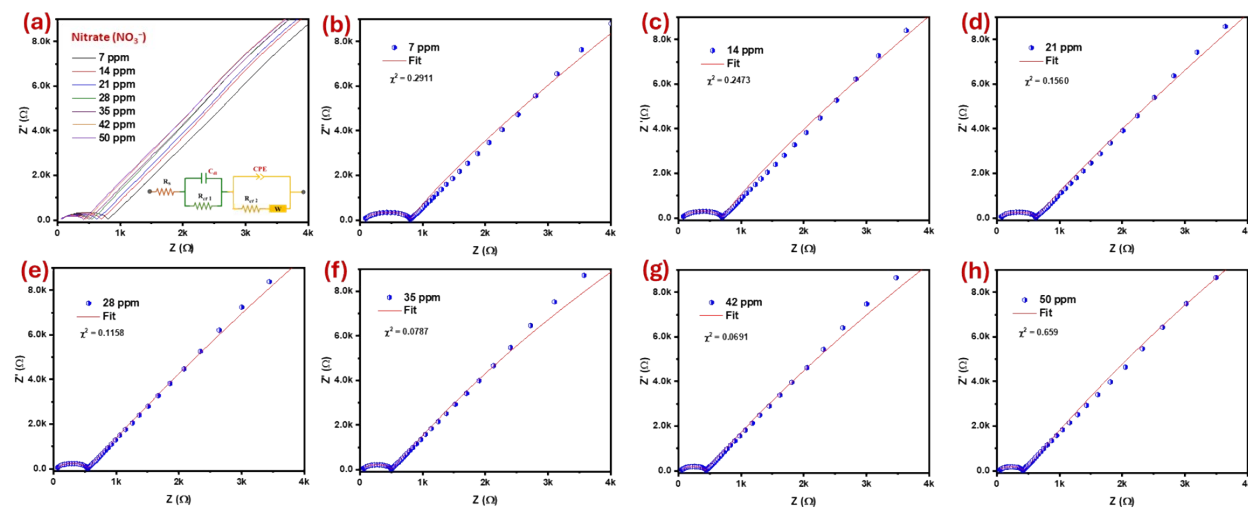

**Figure S3** (a) EIS Spectra of varying  $\text{NO}_3^-$  in simulated solution and (b-h) EIS Spectra fitted with equivalent circuit for varying  $\text{NO}_3^-$  concentration (7 – 50 ppm).

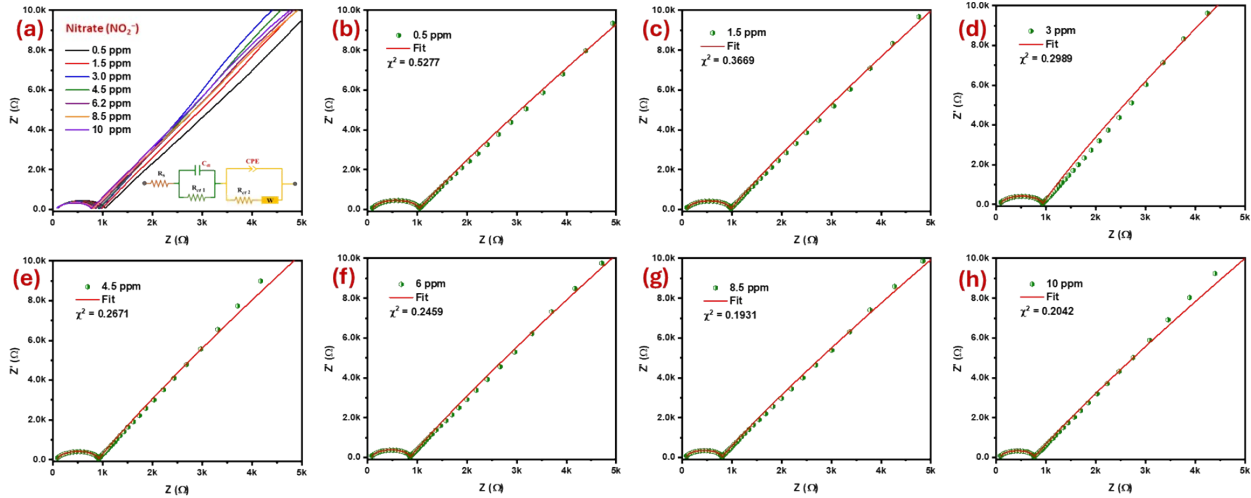

**Figure S4 (a)** EIS Spectra of varying  $\text{NO}_2^-$  in simulated solution and **(b-h)** EIS Spectra fitted with equivalent circuit for varying  $\text{NO}_2^-$  concentration (0.5 – 10 ppm).

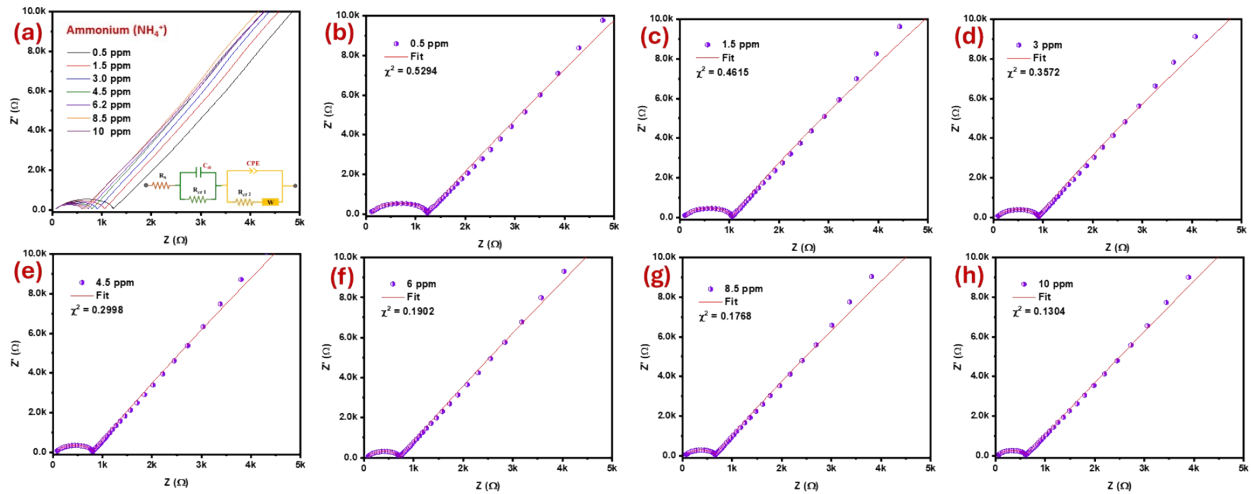

**Figure S5 (a)** EIS Spectra of varying  $\text{NH}_4^+$  in simulated solution and **(b-h)** EIS Spectra fitted with equivalent circuit for varying  $\text{NH}_4^+$  concentration (0.5 – 10 ppm).

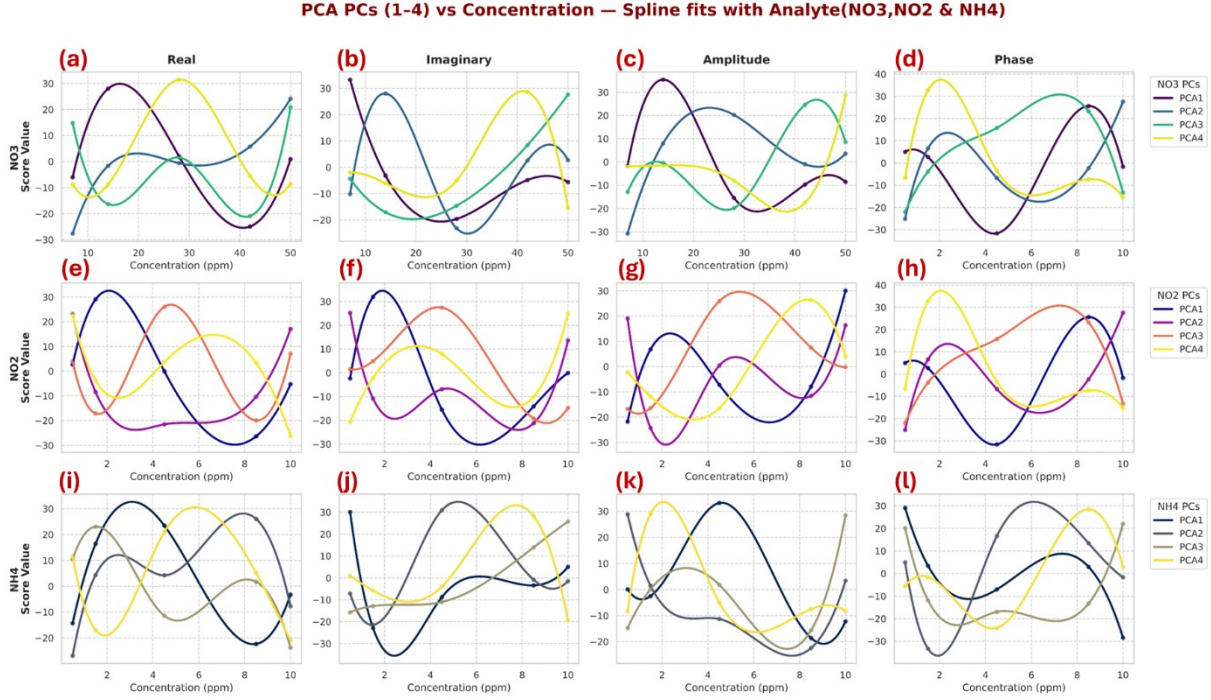

**Figure S6** Spline fits of PC<sub>1</sub>-PC<sub>4</sub> versus concentrations of **(a-d)** NO<sub>3</sub><sup>-</sup>, **(e-h)** NO<sub>2</sub><sup>-</sup>, and **(i-l)** NH<sub>4</sub><sup>+</sup> ions.

### S1. Dataset Preparation:

For each experiment, the impedance was recorded as the real component ( $Z'$ ) and the imaginary component ( $Z''$ ), from which the amplitude and phase of the impedance were derived using the following eqns:

$$|Z| = \sqrt{Z'^2 + Z''^2} \quad (\text{S1})$$

$$\theta = \tan^{-1} \frac{Z''}{Z'} \quad (\text{S2})$$

**Eqns. S1** and **S2** provided two additional parameters that offered a more comprehensive characterization of the electrochemical response.

The concentrations selected for each analyte were as follows: five levels for nitrate (7, 14, 28, 42, and 50ppm) and seven levels for both nitrite and ammonium (0.5, 1.5, 4.5, 8.5, and 10ppm). **Table S3** presents an organized summary of the concentration ranges and fixed median values.

**Table S3:** Concentration ranges and fixed constants for nitrate, nitrite, and ammonia experiments.

| Analyte (Target)                         | Concentration Levels (ppm) | Constants (ppm)              |
|------------------------------------------|----------------------------|------------------------------|
| Nitrate (NO <sub>3</sub> <sup>-</sup> )  | 7, 14, 28, 42, 50          | Nitrite = 4.5, Ammonia = 4.5 |
| Nitrite (NO <sub>2</sub> <sup>-</sup> )  | 0.5, 1.5, 4.5, 8.5, 10     | Nitrate = 28, Ammonia = 4.5  |
| Ammonium (NH <sub>4</sub> <sup>+</sup> ) | 0.5, 1.5, 4.5, 8.5, 10     | Nitrate = 28, Nitrite = 4.5  |

## S2. Exploratory Visualization:

Electrochemical impedance spectroscopy describes impedance as a complex function of angular frequency ( $\omega$ ) (**eqn. S3**)

$$Z(\omega) = Z'(\omega) + jZ''(\omega) \quad (\text{S3})$$

Where  $Z'(\omega)$  and  $Z''(\omega)$  represent the real and imaginary components, respectively, and  $\omega = 2\pi f$  is the angular frequency. For a simple parallel RC system, this relationship can be expressed as **eqn. S4**

$$Z(\omega) = \frac{R}{1 + j\omega RC} \quad (\text{S4})$$

which can be separated into the real and imaginary parts (**eqn. S5**)

$$Z'(\omega) = \frac{R}{1 + (\omega RC)^2} \quad ; \quad Z''(\omega) = \frac{\omega R^2 C}{1 + (\omega RC)^2} \quad (\text{S5})$$

From these components, the impedance amplitude and phase are derived **eqn. S6** and **S7**

$$|Z(\omega)| = \sqrt{Z'(\omega)^2 + Z''(\omega)^2} \quad (\text{S6})$$

$$\theta(\omega) = \tan^{-1} \frac{Z''(\omega)}{Z'(\omega)} \quad (\text{S7})$$

Plots of frequency versus  $Z'(\omega)$ ,  $Z''(\omega)$ ,  $|Z(\omega)|$  and  $\theta(\omega)$  were generated for all concentration levels of  $\text{NO}_3^-$ ,  $\text{NO}_2^-$ , and  $\text{NH}_4^+$ .

## S3. Data Preprocessing and Outlier Removal:

A systematic outlier detection procedure was employed using the Z-score method which assures normal distribution of the measured data. For each impedance parameter (real component, imaginary component, amplitude, and phase), the Z-score was calculated as **eqn. S8**

$$Z = \frac{x - \mu}{\sigma} \quad (\text{S8})$$

where  $\mu$  and  $\sigma$  are the mean and standard deviation of the feature distribution, respectively. These were computed as **eqn. S9** and **S10**

$$\mu = \frac{1}{N} \sum_{i=1}^N x_i \quad (\text{S9})$$

$$\sigma = \sqrt{\frac{1}{N} \sum_{i=1}^N (x_i - \mu)^2} \quad (\text{S10})$$

Here,  $N$  denotes the total number of data points in the dataset,  $x_i$  represents the  $i^{\text{th}}$  data value, and  $x$  in **eqn. S8** corresponds to the individual observation for which the Z-score is calculated.

A data point was considered an outlier if it satisfied the condition given in **eqn. S11**

$$|Z| > Z_{\text{threshold}} \quad (\text{S11})$$

where  $Z_{\text{threshold}} = 3$  was selected in this study. All such outliers were removed from the dataset to improve consistency and reduce noise.

#### **S4. Selection criteria of *Machine Learning Algorithms*:**

To establish the relationship between frequency-dependent impedance parameters and analyte concentration, several nonlinear machine learning algorithms were systematically explored. A variety of approaches were investigated, including Random Forests, k-Nearest Neighbors (KNN), Support Vector Machines (SVM), Artificial Neural Networks (ANN), and Extreme Gradient Boosting (XGBoost). While most of these models demonstrated a partial ability to approximate the complex spectral trends, none - except XGBoost - consistently provided a reliable and robust fit across nitrate, nitrite, and ammonium datasets. In many cases, the models either tended to overfit specific regions of the spectra or exhibited poor generalization when applied to unseen concentration levels, limiting their practical applicability is shown in **Figure S7**. In contrast, XGBoost emerged as the only method capable of capturing the intricate nonlinearities of the data while maintaining stability across all experimental conditions.

For consistency with electrochemical impedance spectroscopy (EIS) notation, the real and imaginary parts of impedance are denoted as  $Z'$  and  $Z''$ , respectively. In the regression framework, we adopt the equivalent notation  $Z_r \equiv Z'$  and  $Z_i \equiv Z''$  for clarity, while the amplitude and phase angle remain as  $|Z|$  and  $\phi$ .

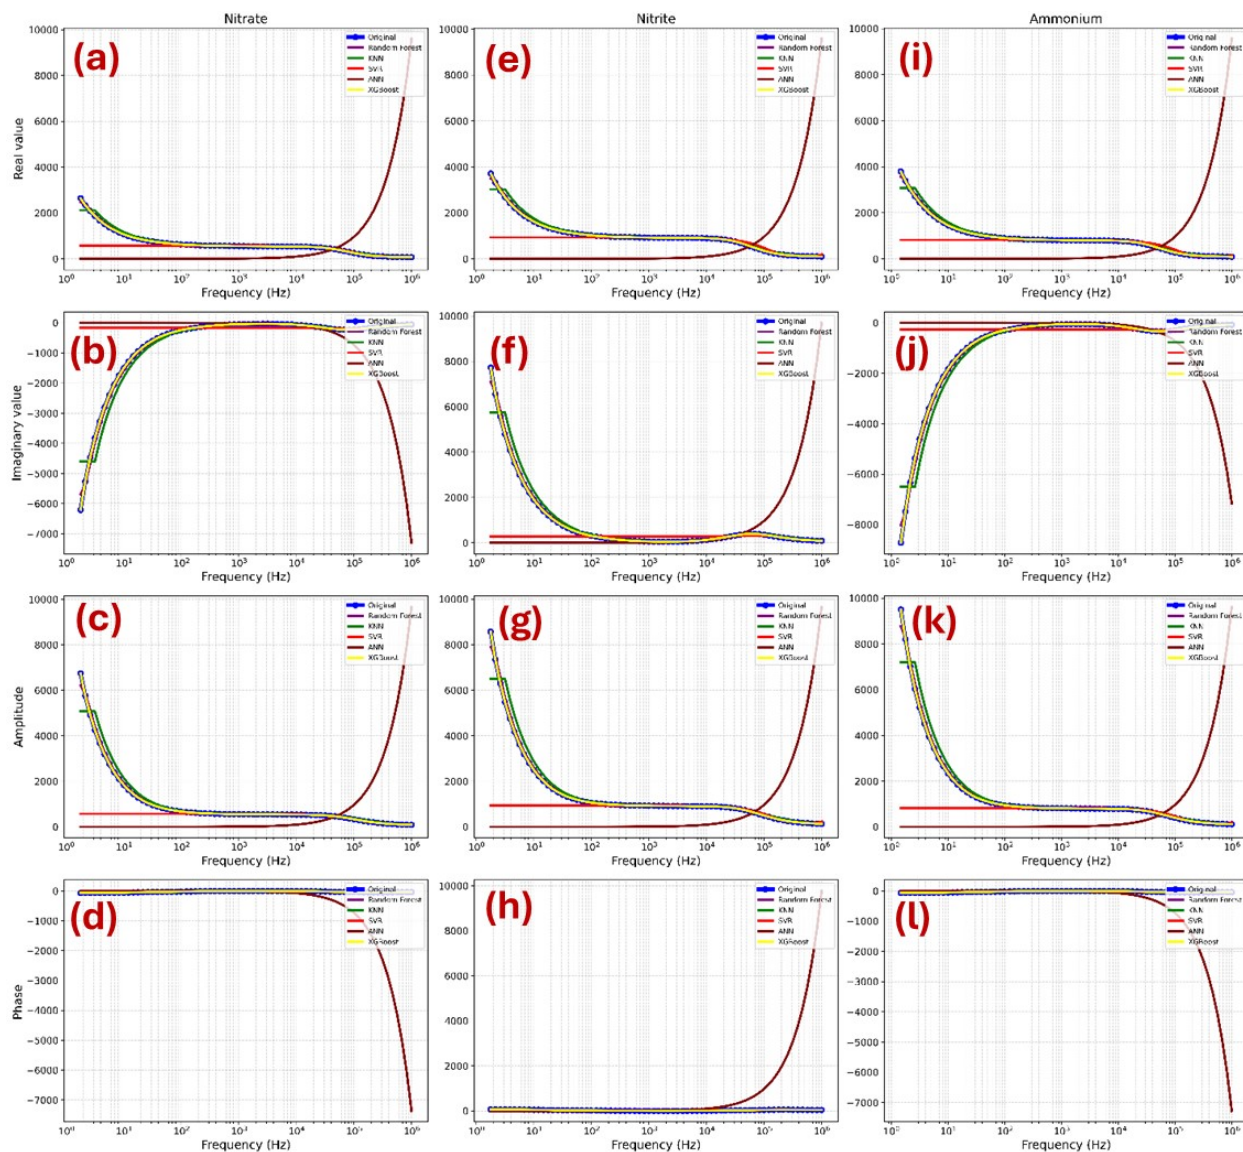

**Figure S7** Machine Learning model comparison at median concentrations of **(a-d)** Nitrate (28ppm), **(e-h)** Nitrite (4.5ppm) and **(i-l)** Ammonium (4.5ppm).

In this work, XGBoost was employed to model the spectral response of each analyte ( $\text{NO}_3^-$ ,  $\text{NO}_2^-$ , and  $\text{NH}_4^+$ ). Frequency served as the independent variable, while the impedance parameters - the real part, imaginary part, amplitude, and phase, i.e.,  $Z'$ ,  $Z''$ ,  $|Z|$  and  $\phi$  respectively were treated as dependent variables. All these parameters are functions of both the analyte concentration and frequency, which can be expressed for nitrate, nitrite, and ammonium in **eqn. S12 - S14**:

For Nitrate ( $\text{NO}_3^-$ ),

$$Z_r = Z_r(C_{\text{NO}_3^-}, f); Z_i = Z_i(C_{\text{NO}_3^-}, f); |Z| = |Z|(C_{\text{NO}_3^-}, f); \phi = \phi(C_{\text{NO}_3^-}, f) \quad (\text{S12})$$

For Nitrite ( $\text{NO}_2^-$ ),

$$Z_r = Z_r(C_{NO_2^-}, f); Z_i = Z_i(C_{NO_2^-}, f); |Z| = |Z|(C_{NO_2^-}, f); \phi = \phi(C_{NO_2^-}, f) \quad (S13)$$

For Ammonium (NH<sub>4</sub><sup>+</sup>)

$$Z_r = Z_r(C_{NO_4^+}, f); Z_i = Z_i(C_{NO_4^+}, f); |Z| = |Z|(C_{NO_4^+}, f); \phi = \phi(C_{NO_4^+}, f) \quad (S14)$$

Here,  $C_{NO_3^-}$ ,  $C_{NO_2^-}$ , and  $C_{NH_4^+}$  denote the concentrations of nitrate, nitrite, and ammonium, respectively, expressed in parts per million (ppm), while  $f$  represents the frequency in Hz.

However, the regression models that ultimately need to be developed are the inverse mappings, where concentration is expressed as a function of impedance features across frequencies, as shown in **eqn. S15 - S17**:

For Nitrate (NO<sub>3</sub><sup>-</sup>):

$$C_{NO_3^-} = C_{NO_3^-}(Z_r(f), Z_i(f), |Z|(f), \phi(f)) \quad (S15)$$

For Nitrite (NO<sub>2</sub><sup>-</sup>):

$$C_{NO_2^-} = C_{NO_2^-}(Z_r(f), Z_i(f), |Z|(f), \phi(f)) \quad (S16)$$

For Ammonium (NH<sub>4</sub><sup>+</sup>):

$$C_{NH_4^+} = C_{NH_4^+}(Z_r(f), Z_i(f), |Z|(f), \phi(f)) \quad (S17)$$

This formulation highlights that while impedance features are inherently functions of both frequency and concentration **eqn. S12 - S14**, the inverse problem - predicting concentration from spectral data (**eqn. S15 - S17**) - requires the construction of robust regression models.

### **S5. Performance evaluation:**

The coefficient of determination ( $R^2$ ) (**eqn. S18**) measures how well the model explains the variance in the experimental data. A perfect score of  $R^2 = 1.0$  was consistently obtained, confirming that the model fully captured the frequency–impedance relationships.

$$R^2 = 1 - \frac{\sum_{i=1}^N (y_i - \hat{y}_i)^2}{\sum_{i=1}^N (y_i - \bar{y})^2} \quad (S18)$$

Here,  $N$  denotes the total number of data points,  $y_i$  represents the  $i^{th}$  experimental value,  $\hat{y}_i$  is the corresponding predicted value, and  $\bar{y}$  is the mean of the experimental values.

The mean squared error (MSE) (**eqn. S19**) represents the average squared deviation between predicted and experimental values, penalizing large errors more heavily. Its square root, the root means square error (RMSE) (**eqn. S20**), provides an interpretable measure of the typical error magnitude. The mean absolute error (MAE) (**eqn. S21**) instead averages absolute deviations, offering a more intuitive sense of prediction accuracy that is less influenced by extreme values.

$$MSE = \frac{1}{N} \sum_{i=1}^N (y_i - \hat{y}_i)^2 \quad (\text{S19})$$

$$RMSE = \sqrt{\left(\frac{1}{N} \sum_{i=1}^N (y_i - \hat{y}_i)^2\right)} \quad (\text{S20})$$

$$MAE = \frac{1}{N} \sum_{i=1}^N |y_i - \hat{y}_i| \quad (\text{S21})$$

Finally, the explained variance (EV) (**eqn. S22**) evaluates how much of the variability in the data is preserved in the predictions. An EV value of 1.0 indicates that the model reproduces the spread of the experimental data without loss of information.

$$EV = 1 - \frac{Var(y - \hat{y})}{Var(y)} \quad (22)$$

**Figure S7** illustrates the mean evaluation metrics of all the machine learning models represented through bar diagrams.

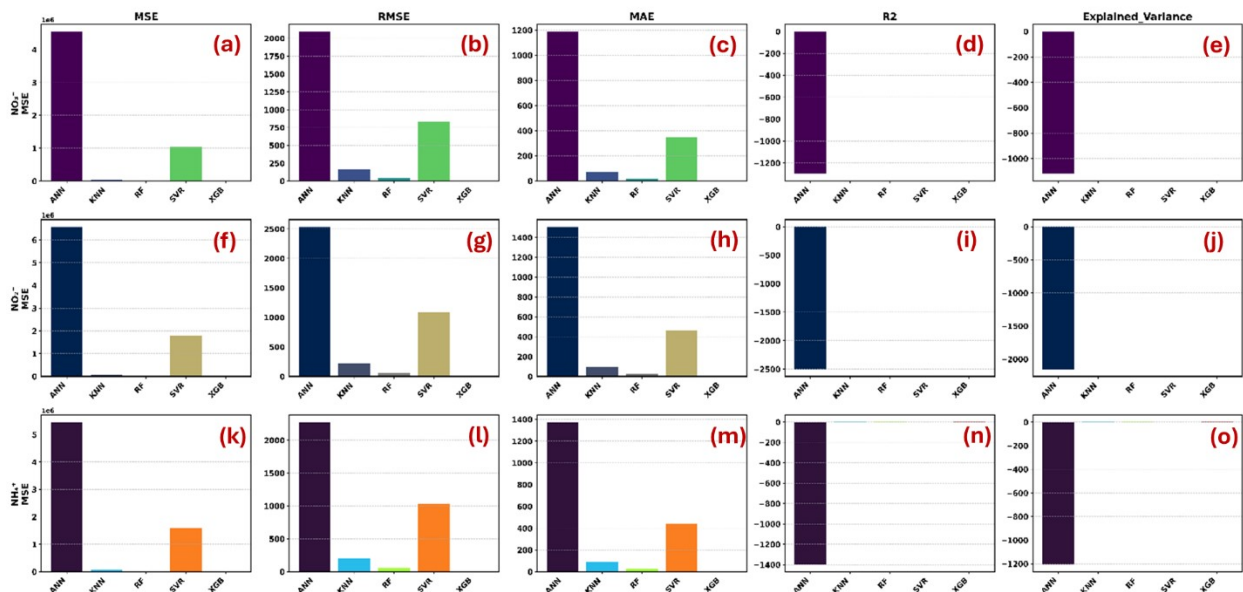

**Figure S8** Bar diagram representation of Mean Evaluation Metrics for Different Machine Learning Models for (a-e) NO<sub>3</sub><sup>-</sup>, (f-j) NO<sub>2</sub><sup>-</sup> and (k-o) NH<sub>4</sub><sup>+</sup> ions.

### S6. Extraction of XGBoost split values:

In tree-based models such as XGBoost, each non-leaf node corresponds to a split threshold on the input variable. In this study, the input was frequency, and each split value, denoted as  $f_s$ , represented a critical frequency at which the model detected significant changes in the impedance response. Extracting these split values therefore allowed the conversion of XGBoost from a black-box predictor into an interpretable tool for feature generation.

For each analyte ( $\text{NO}_3^-$ ,  $\text{NO}_2^-$ , and  $\text{NH}_4^+$ ), split values were extracted separately for the four impedance parameters: the real part ( $Z_r$ ), imaginary part ( $Z_i$ ), amplitude ( $|Z|$ ), and phase ( $\phi$ ). The resulting datasets can be formally expressed as **eqn. S23**:

$$D_{Z_r} = \{(f_s, C)\}; \quad D_{Z_i} = \{(f_s, C)\}; \quad D_{|Z|} = \{(f_s, C)\}; \quad D_{\phi} = \{(f_s, C)\} \quad (\text{S23})$$

Here,  $D$  denotes the structured dataset extracted from the XGBoost split values,  $f_s$  are the frequency thresholds identified at non-leaf nodes, and  $C$  represents the concentration of the analyte ( $\text{NO}_3^-$ ,  $\text{NO}_2^-$ , and  $\text{NH}_4^+$ ) Each dataset was compiled into CSV format, with frequency thresholds as the independent variable and concentration as the dependent variable.

### S7. Final concentration prediction:

After dimensionality reduction, the first six principal components ( $\text{PC}_1$ - $\text{PC}_4$ ) were used as the predictive descriptor vector  $X = [\text{PC}_1, \dots, \text{PC}_4]^T$ . To capture both global and local nonlinear dependencies between impedance-derived features and analyte concentration, a two-stage nonlinear stacking ensemble was adopted.

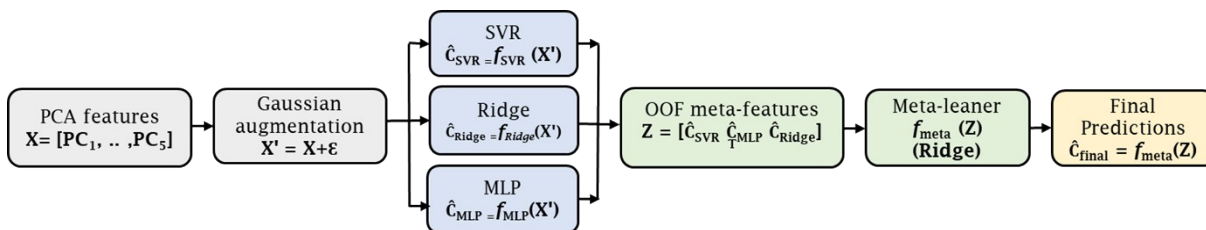

**Figure S9** Schematic of the two-stage nonlinear stacking ensemble used for final concentration prediction.

The overall architecture is summarized in **Figure S9**. PCA features ( $\text{PC}_1$ - $\text{PC}_4$ ) are perturbed by small Gaussian noise for augmentation, then passed to three base learners (SVR, MLP, Ridge). The out-of-fold (OOF) base predictions form the meta-feature vector, which is input to the meta-learner to produce the final concentration estimate  $\hat{c}_{final}$ .

#### S7.1. Stage I: Base-learner modelling:

Three base regressors were trained independently using Group K-Fold cross-validation (groups based on concentration levels) to avoid data leakage between concentration groups. Each base

learner is represented as a mapping from the PCA feature vector  $X$  to an intermediate predicted concentration  $\hat{c}_i$ . The three base mappings are written explicitly as **eqn. S24 – S26**

$$\hat{c}_{SVR} = f_{SVR}(X) = \sum_{j=1}^n \alpha_j K(X_j, X) + b \quad (\text{S24})$$

$$\hat{c}_{MLP} = f_{MLP}(X) = \sigma_2(W_2 \sigma_1(W_1 X + b_1) + b_2) \quad (\text{S25})$$

$$\hat{c}_{Ridge} = f_{Ridge}(X) = X \beta_{Ridge} + b \quad (\text{S26})$$

where,  $\hat{c}_{SVR}, \hat{c}_{MLP}, \hat{c}_{Ridge}$  : out-of-fold predicted concentrations produced by the SVR, MLP, and Ridge base learners, respectively.

$f_{SVR}, f_{MLP}, f_{Ridge}$  : mapping functions implemented by the respective base regressors.

$K(X_j, X)$  : kernel function (radial-basis function used in this work) between training exemplar  $X_j$  and input  $X$ .

$\beta$  : Ridge regression coefficient.

$\alpha_j, b$  : learned dual coefficients and intercept in the SVR representation.

$W_1, W_2$ : weight matrices of the first and second layers in the MLP;  $b_1, b_2$  their corresponding biases.

$\sigma_1, \sigma_2$ : nonlinear activation functions (e.g., ReLU, tanh) used in the hidden and output layers.

$T_k(X)$ :  $k^{th}$  regression tree in the gradient-boosting ensemble;  $\gamma_k$  its scalar weight.

To improve smoothness and generalization for the meta stage, a small Gaussian perturbation (**eqn. S27**) was applied in the PCA space prior to model training:

$$X' = X + \varepsilon; \quad \varepsilon \sim N(0, \sigma^2 I); \quad \sigma \approx 0.002 \quad (\text{S27})$$

where  $X'$  is augmented PCA vector after small Gaussian perturbation.  $\varepsilon \sim N(0, \sigma^2 I)$  is the Gaussian noise vector used for PCA-space augmentation, scaled relative to the magnitude of the PCA components.  $I$  denotes the identity matrix. Augmented samples were used only for training; final model evaluation was performed on the original (non-augmented) measurements (see **Section 3.7**).

The out-of-fold (OOF) predictions from each base learner for a given sample form the meta-feature vector  $Z$ , (**eqn. S28**) is,

$$Z = [\hat{c}_{SVR}, \hat{c}_{MLP}, \hat{c}_{Ridge}]^T \quad (\text{S28})$$

$Z = [\hat{c}_{SVR}, \hat{c}_{MLP}, \hat{c}_{Ridge}]^T$  is the meta-feature vector of OOF base predictions used to train the meta learner.

## S7.2. Stage II: Meta-learner integration:

The meta-learner  $f_{meta}$  integrates the base learners' responses to produce the final concentration ( $\hat{c}_{final}$ ) estimate using **eqn. S29**:

$$\hat{c}_{final} = f_{meta}(Z) \quad (\text{S29})$$

$f_{meta}(\cdot)$  is the meta-learner function (nonlinear mapping from  $Z$  to  $\hat{C}_{final}$ ), implemented as Ridge regression in the present work.

The above formulation describes a physically interpretable and statistically robust mapping from impedance derived PCA features to analyte concentration values. **Figure S9** provides a schematic overview of the pathway described by **eqn. S24– S29**.
